# Supplementary material
Source: Springer Nature journal article supplement (https://www.springermedizin.de/resource/supplementary/12936_2009_1233_MOESM4_ESM.pdf/9549290)

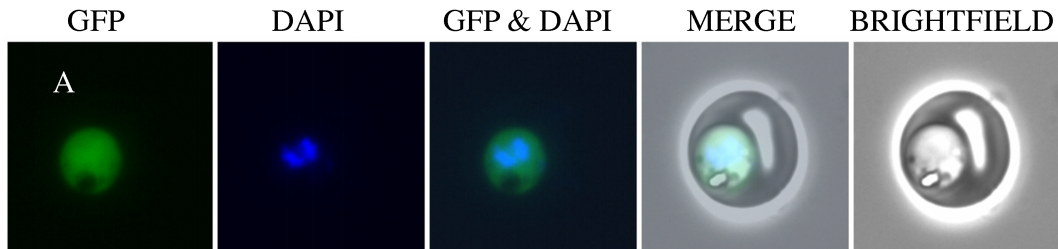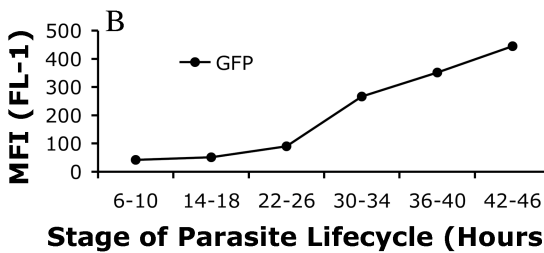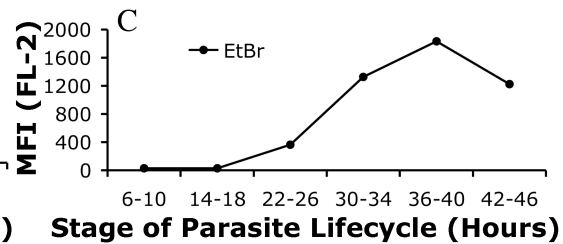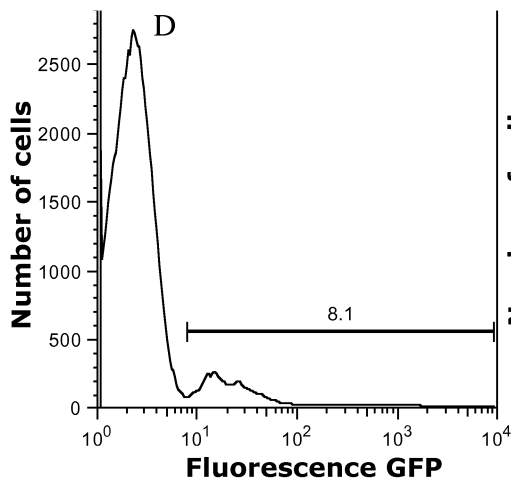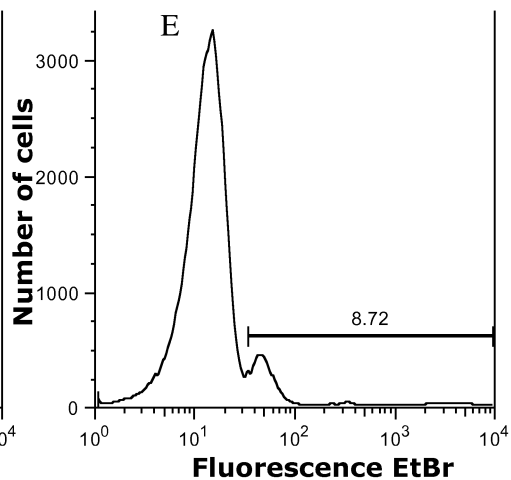

Supplement: MOESM4 [file 9549290]
